# Supplementary material for: Genetic variation in IL28B and spontaneous clearance of hepatitis C virus
Source: Springer Nature journal article supplement (doi:10.1038/nature08463), 2009-09-16
Supplement: 41586_2009_BFnature08463_MOESM319_ESM.pdf [file 41586_2009_BFnature08463_MOESM319_ESM.pdf]

## SUPPLEMENTARY INFORMATION

**Genetic variation in *IL28B* and spontaneous clearance of Hepatitis C Virus****Supplementary information****I. Analysis adjusting by homozygosity for *KIR2DL3/HLA-C* group 1**

We previously showed a protective effect of homozygosity for the compound genotype *KIR2DL3/HLA-C* group 1 in injection drug users<sup>1</sup>. We therefore adjusted for the presence of this protective compound genotype in our analyses. After adjustment, the association with the rs12979860 C allele and HCV clearance remained unaltered (data not shown). In the Khakoo et al. study, the protective effect was observed only among injection drug users, who likely received low-titer HCV inocula, but not among hemophiliacs who are likely to have received relatively large viral titer inocula. The interpretation for this difference was that the influence of natural killer (NK) cell activity, as modulated by the *KIR2DL3* receptor/ *HLA-C* ligand combination, was great enough to affect outcome when the individuals were exposed to low levels of virus, but that the NK cell response could not contain a large bolus of viral inoculum, such as that received by hemophiliacs. We therefore tested whether there were any differences in the effect of the protective rs12979860 C allele in infection acquired by blood products (high titre inoculum) versus that acquired by injection drug use (low titre inoculum), but no significant differences were observed between the two groups (data not shown).

**II. Analysis of the effect of rs12979860 on HCV viral load**

HCV viral load data was available for 404 individuals from MHCS, HGDS and ALIVE. One blood sample from each individual was assessed for HCV RNA by a bDNA assay (see II above). Viral load levels were  $\log_{10}$  transformed and the values were correlated to rs12979860 genotype in all racial groups and whites and blacks separately. A regression model ( $\log_{10}$ VL as dependent variable and genotype as independent variable) was performed using SAS PROC REG. In the model, genotype data were used in the form of ordered categories, where CC=2, CT=1 and TT=0.

**Table S1: HBV does not confound the effect of rs12979860 genotype on outcome of HCV infection**

| All subjects,<br>genotype   | Frequency of<br>clearance, %(N) | Frequency of<br>persistence, %(N) | Comparison  | Adjusted by cohort and ethnicity                |                     |
|-----------------------------|---------------------------------|-----------------------------------|-------------|-------------------------------------------------|---------------------|
|                             |                                 |                                   |             | OR (95% CI)                                     | P value             |
| TT                          | 23.4 (37)                       | 76.6 (121)                        | CC vs TT    | 0.29 (0.18-0.47)                                | 4x10 <sup>-7</sup>  |
| CT                          | 29.5 (124)                      | 70.5 (297)                        | CC vs CT    | 0.35 (0.25-0.48)                                | 4x10 <sup>-11</sup> |
| CT+TT                       | 28 (161)                        | 72 (418)                          | CC vs CT+TT | 0.33 (0.25-0.45)                                | 3x10 <sup>-13</sup> |
| CC                          | 53 (227)                        | 47 (202)                          |             |                                                 |                     |
|                             |                                 |                                   |             |                                                 |                     |
| All subjects,<br>genotype   |                                 |                                   |             | Adjusted by cohort, ethnicity and HBV<br>status |                     |
| TT                          | 21.8 (32)                       | 78.2 (115)                        | CC vs TT    | 0.29 (0.18-0.47)                                | 8x10 <sup>-7</sup>  |
| CT                          | 25.6 (98)                       | 74.4 (285)                        | CC vs CT    | 0.34 (0.25-0.47)                                | 9x10 <sup>-11</sup> |
| CT+TT                       | 24.5 (130)                      | 75.5 (400)                        | CC vs CT+TT | 0.33 (0.24-0.44)                                | 7x10 <sup>-13</sup> |
| CC                          | 47.9 (178)                      | 52.1 (194)                        |             |                                                 |                     |
|                             |                                 |                                   |             |                                                 |                     |
| White subjects,<br>genotype |                                 |                                   |             | Adjusted by cohort and HBV status               |                     |
| TT                          | 29.2 (14)                       | 70.8 (34)                         | CC vs TT    | 0.51 (0.26-1.02)                                | 0.06                |
| CT                          | 22.3 (51)                       | 77.7 (178)                        | CC vs CT    | 0.34 (0.23-0.51)                                | 2x10 <sup>-7</sup>  |
| CT+TT                       | 23.5 (65)                       | 76.5 (212)                        | CC vs CT+TT | 0.37 (0.25-0.54)                                | 2x10 <sup>-7</sup>  |
| CC                          | 44.8 (126)                      | 55.2 (155)                        |             |                                                 |                     |
|                             |                                 |                                   |             |                                                 |                     |
| Black subjects,<br>genotype |                                 |                                   |             | Adjusted by cohort and HBV status               |                     |
| TT                          | 19.3 (17)                       | 80.7 (71)                         | CC vs TT    | 0.19 (0.09-0.41)                                | 2x10 <sup>-5</sup>  |
| CT                          | 32.3 (42)                       | 67.7 (88)                         | CC vs CT    | 0.40 (0.21-0.76)                                | 0.01                |
| CT+TT                       | 27.1 (59)                       | 72.9 (159)                        | CC vs CT+TT | 0.31 (0.17-0.57)                                | 2x10 <sup>-4</sup>  |
| CC                          | 55.2 (32)                       | 44.8 (26)                         |             |                                                 |                     |

OR = odds ratio; CI = confidence interval

**Table S2: HIV does not confound the effect of rs12979860 genotype on outcome of HCV infection**

| All subjects,<br>genotype                  | Frequency of<br>clearance, %(N) | Frequency of<br>persistence, %(N) | Comparison  | Adjusted by cohort and ethnicity |                     |
|--------------------------------------------|---------------------------------|-----------------------------------|-------------|----------------------------------|---------------------|
|                                            |                                 |                                   |             | OR (95% CI)                      | P value             |
| TT                                         | 23.4 (37)                       | 76.6 (121)                        | CC vs TT    | 0.29 (0.18-0.47)                 | 4x10 <sup>-7</sup>  |
| CT                                         | 29.5 (124)                      | 70.5 (297)                        | CC vs CT    | 0.35 (0.25-0.48)                 | 4x10 <sup>-11</sup> |
| CT+TT                                      | 28 (161)                        | 72 (418)                          | CC vs CT+TT | 0.33 (0.25-0.45)                 | 3x10 <sup>-13</sup> |
| CC                                         | 53 (227)                        | 47 (202)                          |             |                                  |                     |
|                                            |                                 |                                   |             |                                  |                     |
| <b>HIV positive<br/>subjects, genotype</b> |                                 |                                   |             | Adjusted by cohort and ethnicity |                     |
| TT                                         | 12.5 (5)                        | 87.5 (35)                         | CC vs TT    | 0.12 (0.04-0.36)                 | 2x10 <sup>-4</sup>  |
| CT                                         | 24 (23)                         | 76 (73)                           | CC vs CT    | 0.22 (0.11-0.45)                 | 2x10 <sup>-5</sup>  |
| CT+TT                                      | 20.6 (28)                       | 79.4 (108)                        | CC vs CT+TT | 0.20 (0.10-0.37)                 | 9x10 <sup>-7</sup>  |
| CC                                         | 52.2 (47)                       | 47.8 (43)                         |             |                                  |                     |
|                                            |                                 |                                   |             |                                  |                     |
| <b>HIV negative<br/>subjects, genotype</b> |                                 |                                   |             | Adjusted by cohort and ethnicity |                     |
| TT                                         | 27.1 (32)                       | 72.9 (86)                         | CC vs TT    | 0.37 (0.21-0.63)                 | 3x10 <sup>-4</sup>  |
| CT                                         | 31.1 (101)                      | 68.9 (224)                        | CC vs CT    | 0.39 (0.28-0.56)                 | 2x10 <sup>-7</sup>  |
| CT+TT                                      | 30 (133)                        | 70 (310)                          | CC vs CT+TT | 0.38 (0.28-0.54)                 | 2x10 <sup>-8</sup>  |
| CC                                         | 53.1 (180)                      | 46.9 (159)                        |             |                                  |                     |
|                                            |                                 |                                   |             |                                  |                     |

OR = odds ratio; CI = confidence interval

**Table S3: There is no evidence for bias as a consequence of the lack of matching in some cohorts on the effect of rs12979860 genotype on outcome of HCV infection**

| All subjects,<br>genotype              | Frequency of<br>clearance, %(N) | Frequency of<br>persistence, %(N) | Comparison  | Adjusted by cohort and ethnicity |                     |
|----------------------------------------|---------------------------------|-----------------------------------|-------------|----------------------------------|---------------------|
|                                        |                                 |                                   |             | OR (95% CI)                      | P value             |
| TT                                     | 23.4 (37)                       | 76.6 (121)                        | CC vs TT    | 0.29 (0.18-0.47)                 | 4x10 <sup>-7</sup>  |
| CT                                     | 29.5 (124)                      | 70.5 (297)                        | CC vs CT    | 0.35 (0.25-0.48)                 | 4x10 <sup>-11</sup> |
| CT+TT                                  | 28 (161)                        | 72 (418)                          | CC vs CT+TT | 0.33 (0.25-0.45)                 | 3x10 <sup>-13</sup> |
| CC                                     | 53 (227)                        | 47 (202)                          |             |                                  |                     |
| <b>Matched cohorts,<br/>genotype</b>   |                                 |                                   |             |                                  |                     |
|                                        |                                 |                                   |             | Adjusted by cohort and ethnicity |                     |
| TT                                     | 22.4 (30)                       | 77.6 (104)                        | CC vs TT    | 0.28 (0.16-0.48)                 | 4x10 <sup>-6</sup>  |
| CT                                     | 25.9 (78)                       | 74.1 (223)                        | CC vs CT    | 0.33 (0.23-0.48)                 | 7x10 <sup>-9</sup>  |
| CT+TT                                  | 24.8 (108)                      | 75.2 (327)                        | CC vs CT+TT | 0.31 (0.22-0.45)                 | 1x10 <sup>-10</sup> |
| CC                                     | 48.3 (124)                      | 51.7 (133)                        |             |                                  |                     |
| <b>Unmatched cohorts,<br/>genotype</b> |                                 |                                   |             |                                  |                     |
|                                        |                                 |                                   |             | Adjusted by cohort and ethnicity |                     |
| TT                                     | 29.2 (7)                        | 70.8 (17)                         | CC vs TT    | 0.34 (0.11-1.02)                 | 0.05                |
| CT                                     | 38.3 (46)                       | 61.7 (74)                         | CC vs CT    | 0.40 (0.23-0.71)                 | 2x10 <sup>-3</sup>  |
| CT+TT                                  | 36.8 (53)                       | 63.2 (91)                         | CC vs CT+TT | 0.40 (0.23-0.68)                 | 7x10 <sup>-4</sup>  |
| CC                                     | 59.9 (103)                      | 40.1 (69)                         |             |                                  |                     |

OR = odds ratio; CI = confidence interval

**A. All subjects**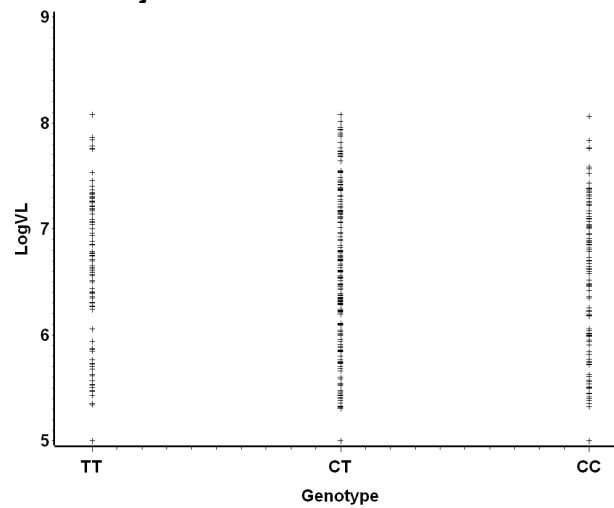**B. White subjects**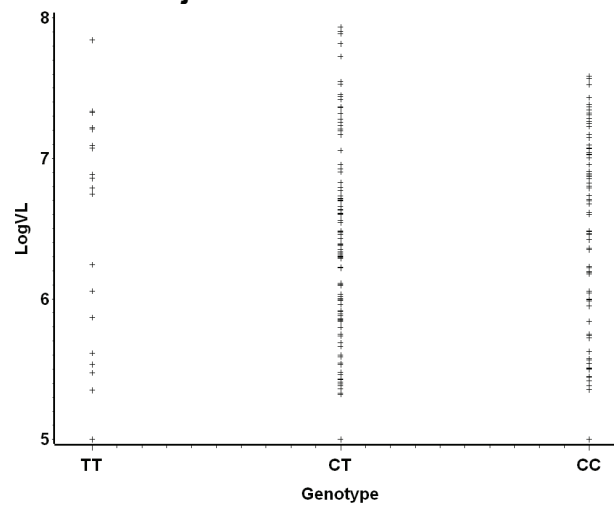**C. Black subjects**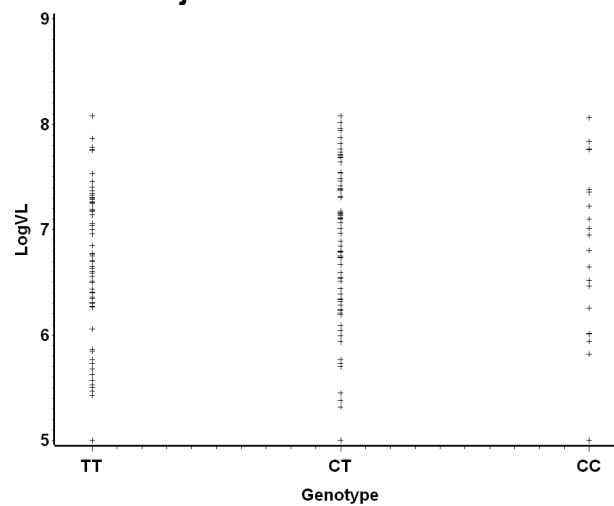

**Figure S1.** The effect of rs12979860 genotype on HCV viral load. A) All patients, B) white subjects, C) Black subjects. The results indicate that there is no correlation between HCV viral load and rs12979860 genotype ( $R^2 = 0.0015, 0.0006, 0.0055$  for all subjects, whites and blacks respectively).

## References

- 1 Khakoo, S.I. *et al.*, HLA and NK cell inhibitory receptor genes in resolving hepatitis C virus infection. *Science* 305 (5685), 872-874 (2004).
